# Supplementary material for: The Role of Hydrodynamic Processes on Anchovy Eggs and Larvae Distribution in the Sicily Channel (Mediterranean Sea): A Case Study for the 2004 Data Set
Source: PubMed Central journal article supplement (PMC4411133; doi:10.1371/journal.pone.0123213), 2015-04-27

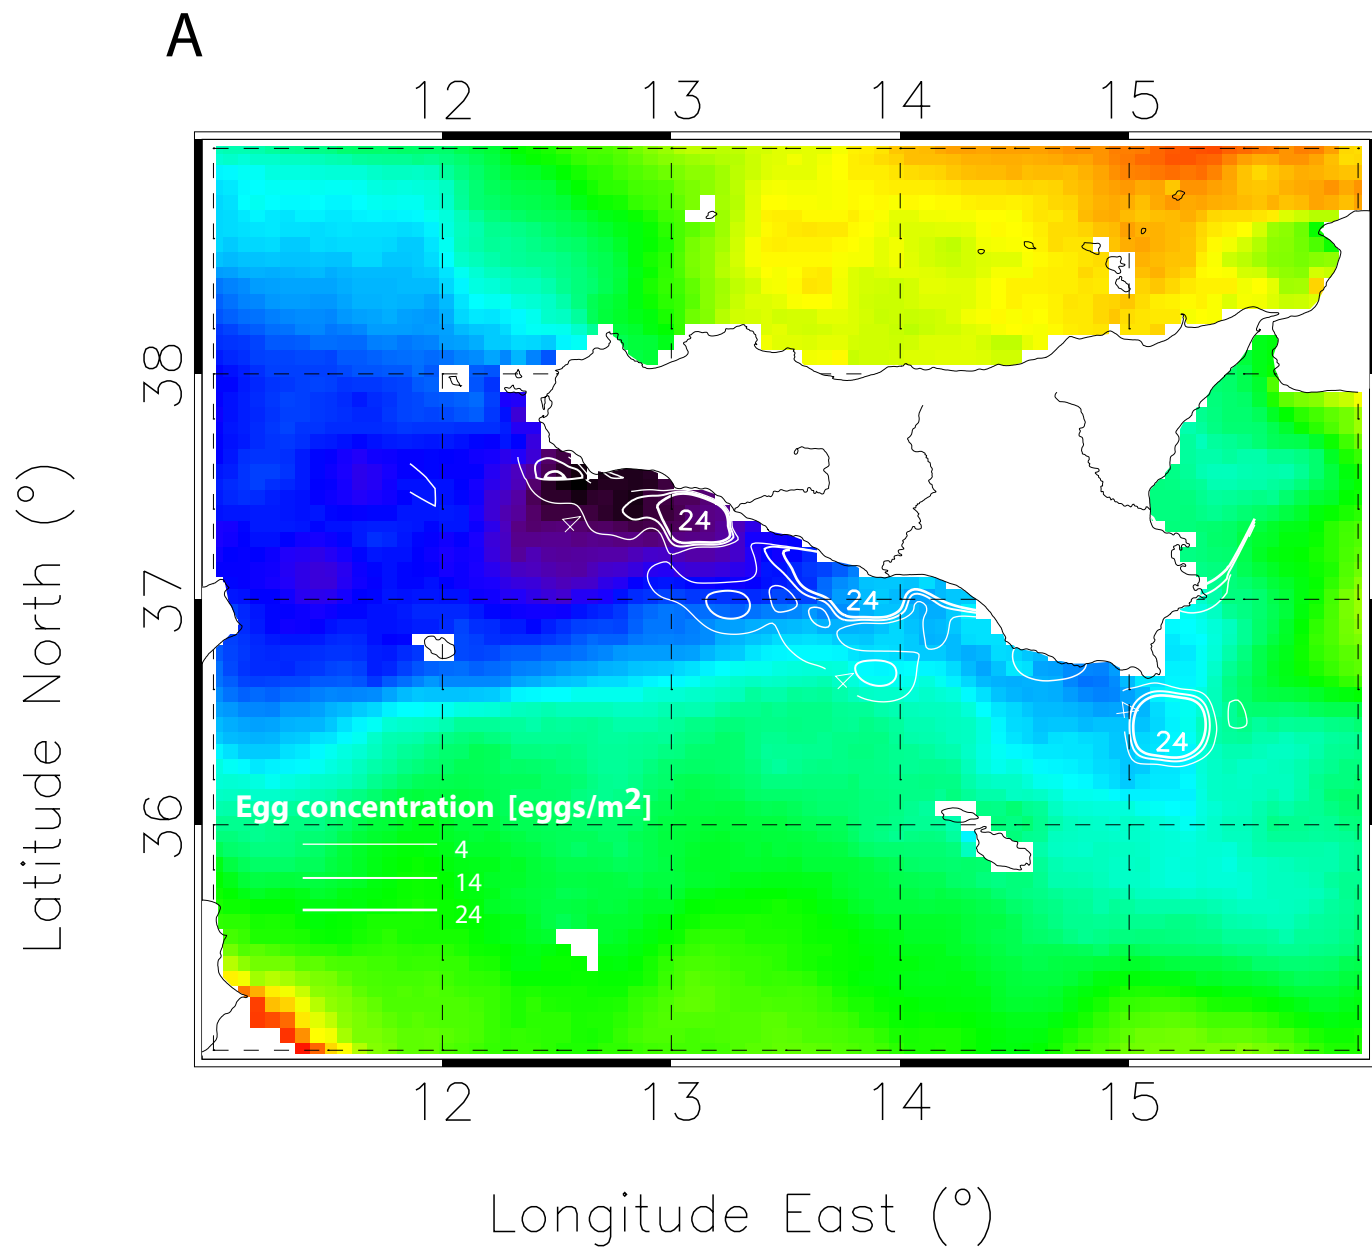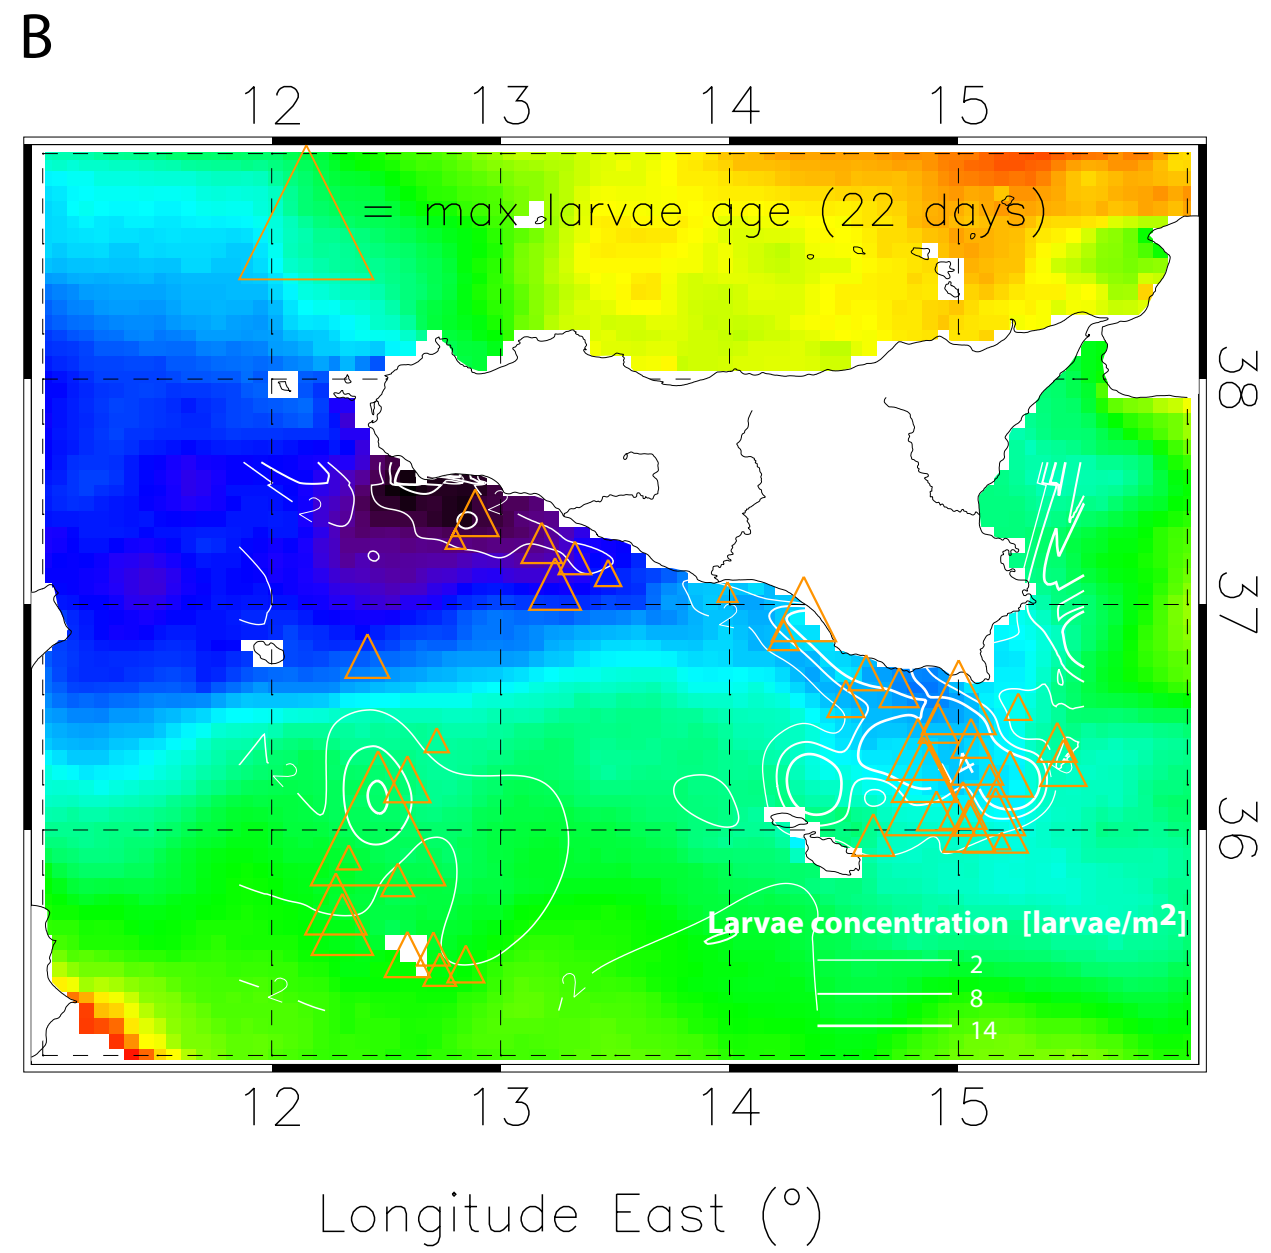

Supplement: pone.0123213.s001.pdf [file pone.0123213.s001.pdf]
